# Supplementary material for: Psychological resilience correlates with EEG source-space brain network flexibility
Source: PubMed Central journal article supplement (PMC6444909; doi:10.1162/netn_a_00079), 2019-03-01
Supplement: netn-03-539-s001.pdf [file netn-03-539-s001.pdf]

Paban, V., Modolo, J., Mheich, A., & Hassan, M. (2019). Supporting information for “Psychological resilience correlates with EEG source-space brain network flexibility.” *Network Neuroscience*, 3(2), 539–550. [https://doi.org/10.1162/netn\\_a\\_00079](https://doi.org/10.1162/netn_a_00079)

Supplementary materials  
**Psychological resilience correlates with EEG source-space  
brain network flexibility**

Veronique Paban<sup>1</sup>, Julien Modolo<sup>2</sup>, Ahmad Mheich<sup>2</sup>, Mahmoud Hassan<sup>2</sup>

<sup>1</sup>Aix Marseille Univ, CNRS, LNSC, Marseille France

<sup>2</sup>Univ Rennes, INSERM, LTSI - U1099, F-35000 Rennes, France

Corresponding author:

Julien Modolo – [julien.modolo@inserm.fr](mailto:julien.modolo@inserm.fr) - Laboratoire Traitement du Signal et de l'Image (LTSI), Bâtiment 22 Campus de Beaulieu, 35042 Rennes Cedex, France

## Clustering Coefficient

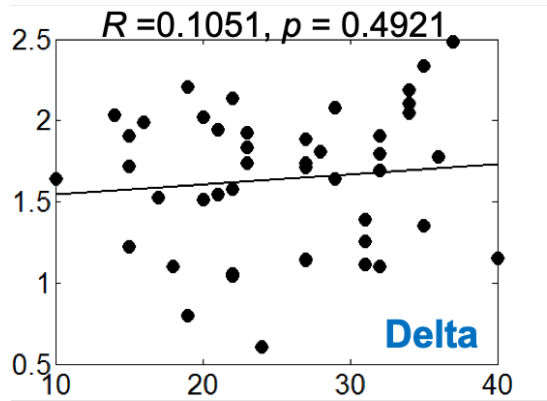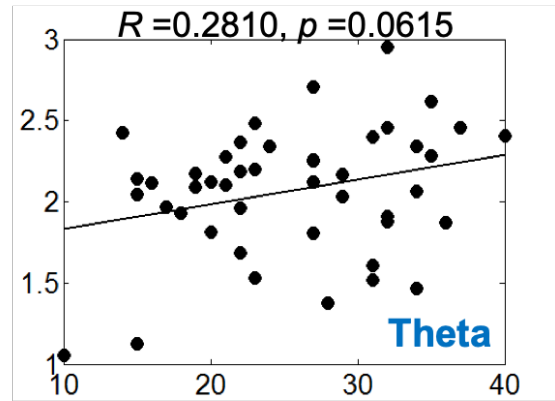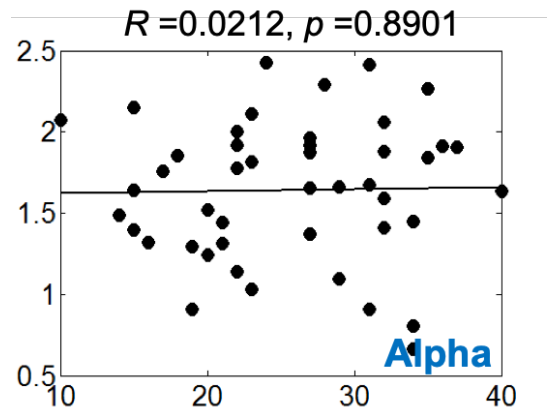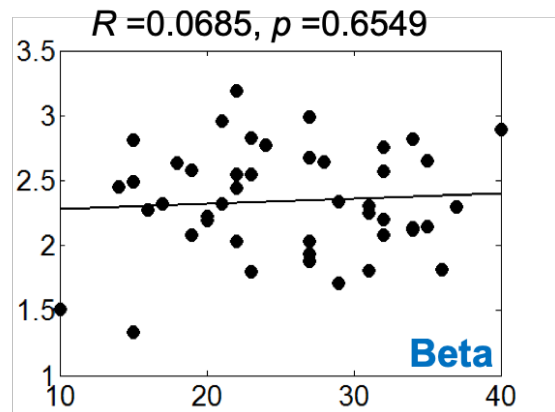

CD-RISC

CD-RISC

Figure S1. Correlation between the Resilience score and the global clustering coefficients at the different frequency bands.

## Betweenness Centrality

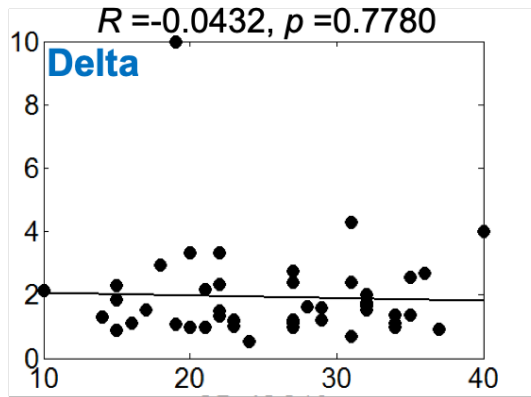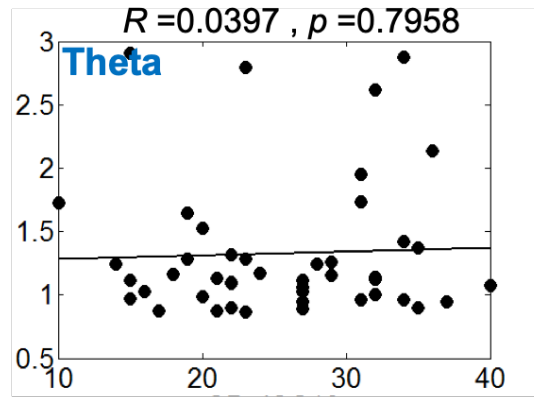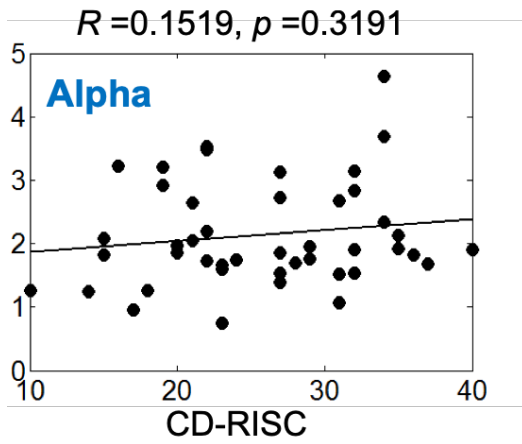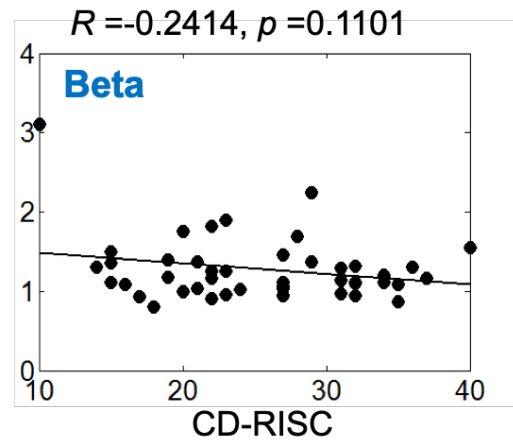

Figure S2. Correlation between the Resilience score and the global betweenness centrality at the different frequency bands.
